# Supplementary material
Source: PubMed Central journal article supplement (PMC6002691)
Supplement: MCB.00085-18_zmb999101783s1.pdf [file MCB.00085-18_zmb999101783s1.pdf]

## Supplemental Data

### Figure S1

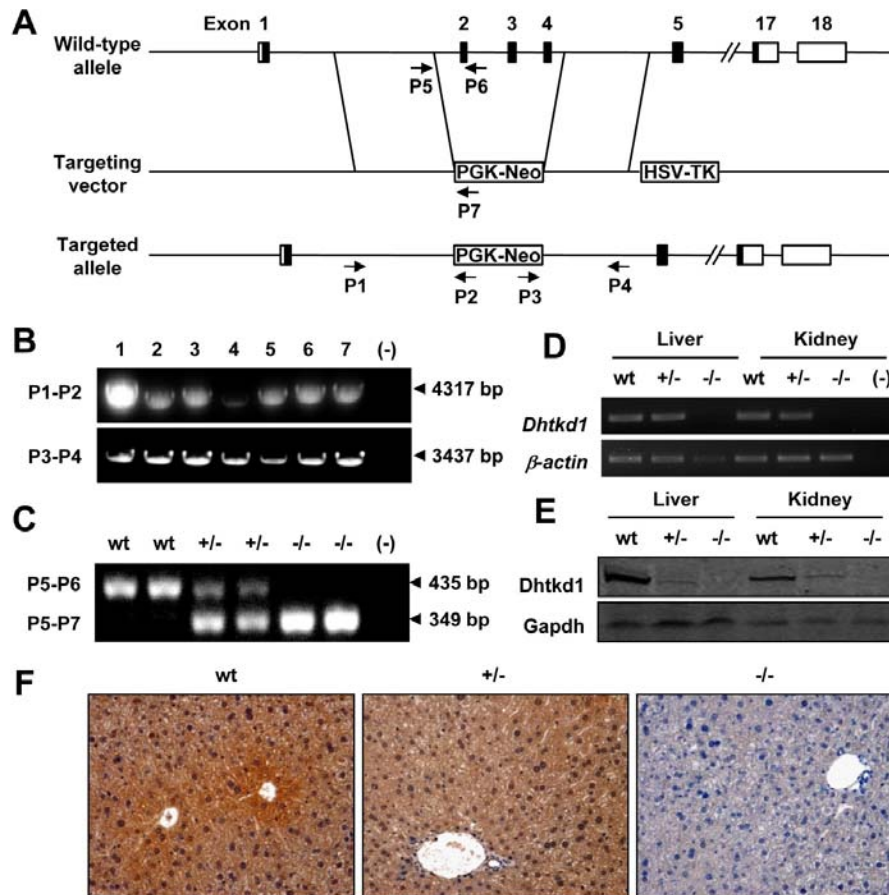

**Figure S1. Targeted deletion of *Dhtkd1* in mice.** (A) Schematic representation of *Dhtkd1* gene knock-out strategy. The targeting vector was designed to delete the genomic region from exon 2 to exon 4. Exons and introns are represented by boxes and horizontal lines, respectively. The coding region is shown in black. Fragments amplified by PCR for genotyping are indicated by arrows. (B) PCR analysis of recombinant ES cell clones. Genomic DNA extracted from ES cell clones was amplified using 5'-external and 3'-external primers as shown in panel. Homologous recombination events yielded a 4.3-kb or 3.4-kb fragments, respectively. (C) PCR genotyping of progenies from heterozygous matings. Wild-type (wt), heterozygous (*Dhtkd1*<sup>+/-</sup>) and homozygous (*Dhtkd1*<sup>-/-</sup>) mice were identified by PCR amplification of the fragments specific for either *Dhtkd1* wild-type allele (435 bp) or the targeted allele

(349 bp). (D) RT-PCR analysis for *Dhtkd1* mRNA in liver and kidney with primer e1/e3. The 418-bp *Dhtkd1*-specific fragment is absent only in *Dhtkd1*<sup>-/-</sup> mice. *Actb* is used as a loading control. (E) Western blot analysis shows that *Dhtkd1* protein is disappeared in liver and kidney of *Dhtkd1*<sup>-/-</sup> mice. (F) Immunohistochemical staining for *Dhtkd1* in liver. Magnification, 200×.

**Figure S2**

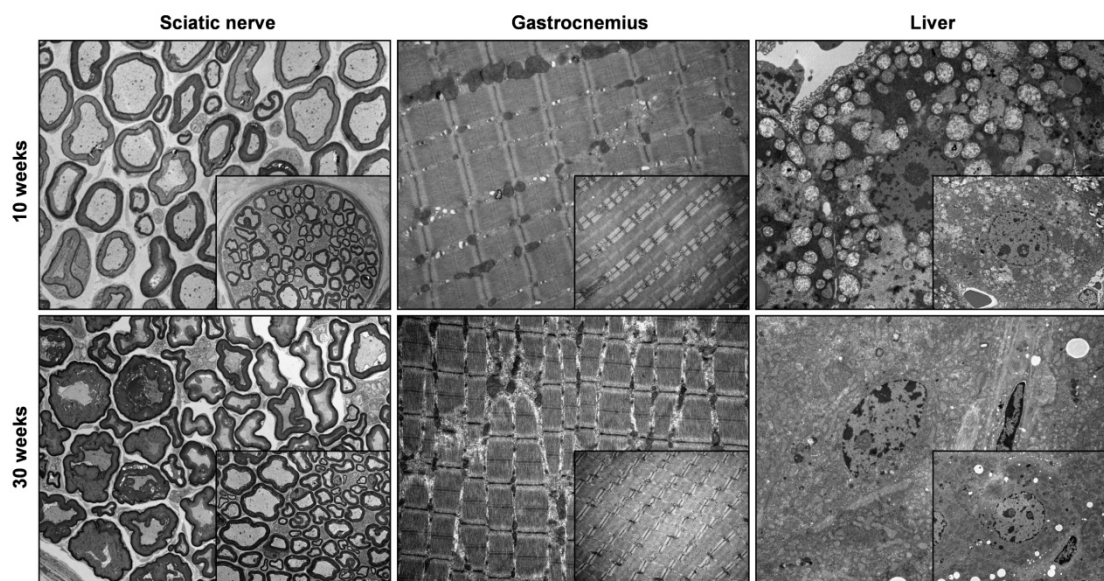

**Figure S2. Aggravation of peripheral nerve, muscle and liver changes with the age of mice lacking *Dhtkd1*.** Electron micrographs of cross-sections of sciatic nerves, gastrocnemius muscle and liver in the young adulthood (10 weeks old) and middle age (30 weeks old) of *Dhtkd1*<sup>-/-</sup> mice are shown. The inserts indicate morphology of wt tissues.

Figure S3

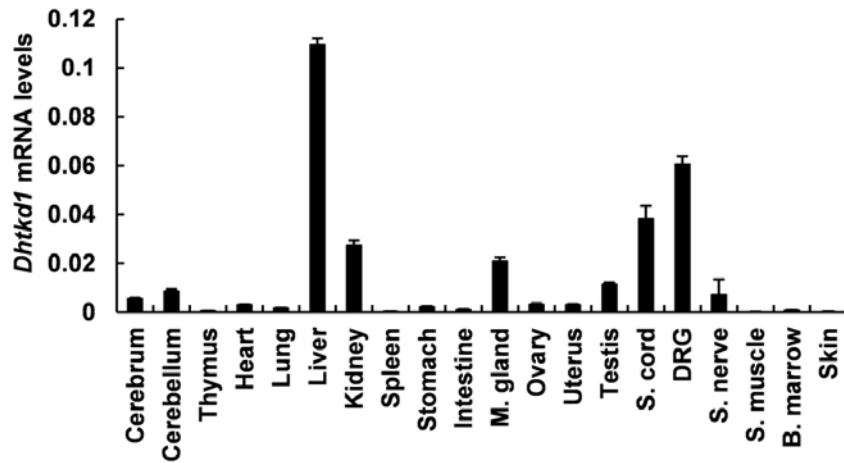

Figure S3. *Dhtkd1* expression profile in mice. Real-time PCR analysis for *Dhtkd1* mRNA expression.

Values are shown as means  $\pm$  S.D. M. gland, mammary gland; S. cord, spinal cord; DRG, dorsal root ganglion; S. nerve, sciatic nerve; S. muscle, skeletal muscle; B. marrow, bone marrow.

Figure S4

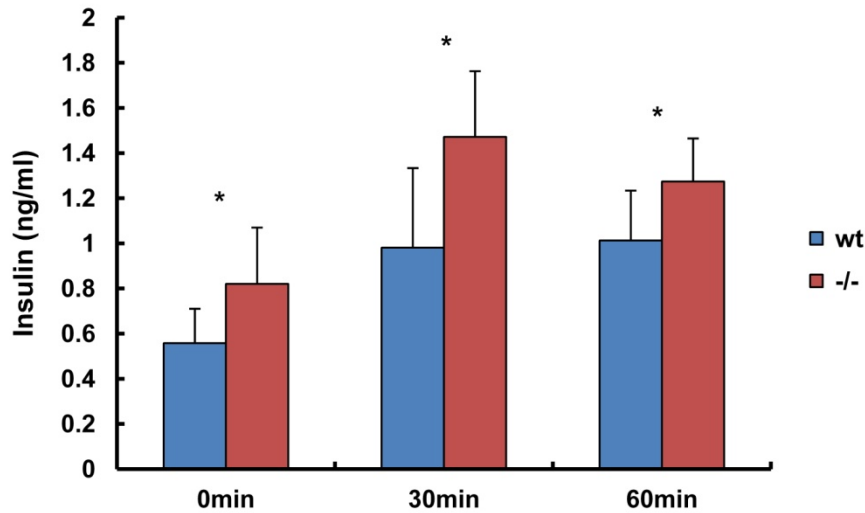

Figure S4. Insulin levels during GTT, related to Fig3G. During the GTT, insulin levels of different time

points were determined by ELISA. Values are shown as means  $\pm$  S.D.

Figure S5

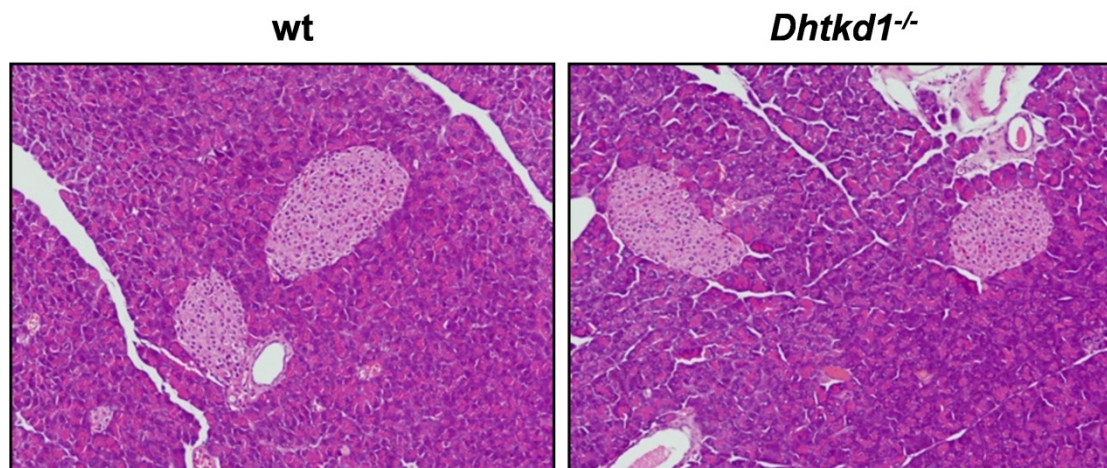

Figure S5. Comparison of islet structure between wt and *Dhtkd1*<sup>-/-</sup> mice. H&E staining of tissue and cellular morphology in wt and *Dhtkd1*<sup>-/-</sup> pancreas and islets, showing no significant structural difference between two genotypes.

Figure S6

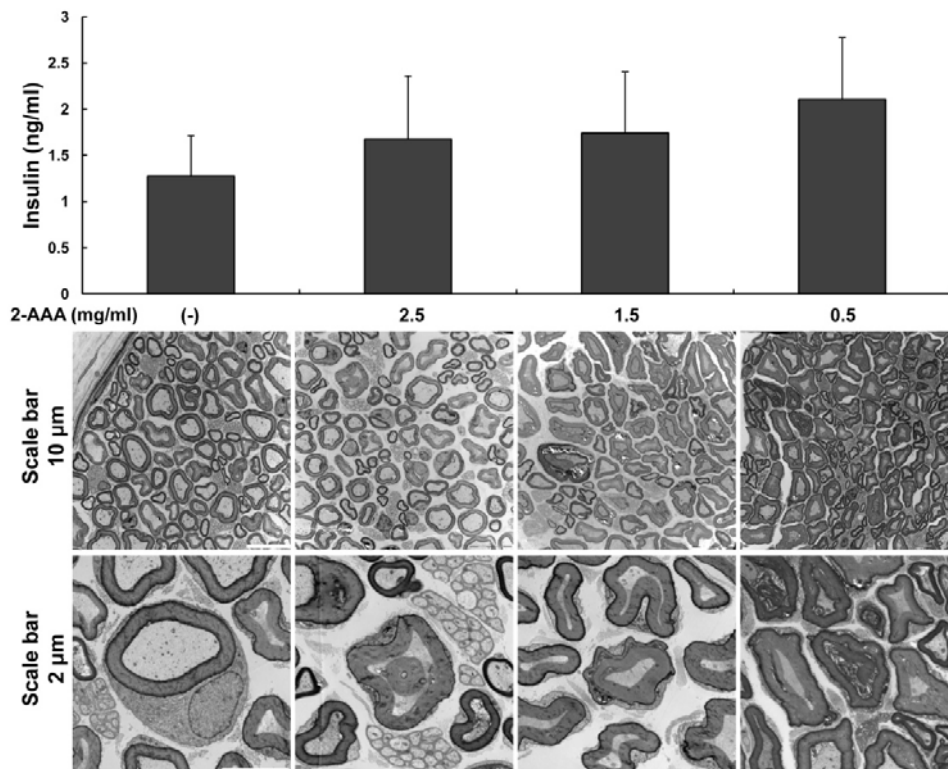

Figure S6. Insulin levels and pathological changes (TEM) of sciatic nerve.

**Table S1. The primers used in this study**

|           |                         |
|-----------|-------------------------|
| P1        | GAAAAATGGCGATCCTCAAG    |
| P2        | GGGGAACTTCCTGACTAGGG    |
| P3        | TCGCCTTCTTGACGAGTTCT    |
| P4        | CTCTGAGCAGACCTGGGAAC    |
| P5        | GTTGGCTTTGGTGTTCGTC     |
| P6        | AAGGCTCTTCCTGCCAGTTC    |
| P7        | GGTAGAATTCGACGACCTGC    |
| Dhtkd1-e1 | ATTCTTCCACGGCGTCTT      |
| Dhtkd1-e3 | CTCTCTCTTCCTGGCTCTGAA   |
| Dhtkd1    | GCTGCTGCGGTTTATTGGTG    |
|           | CAAGGCAAGTGTCTCTGCG     |
| Gjb1      | GCACGTAGCTCACCAACAG     |
|           | TGATGACATAGGTCCACCACA   |
| Mpz       | TACAGTGACAACGGCACTTTC   |
|           | GCAGTACCGAATCAGGTAGAAGA |
| Mbp       | GGCCAGTAAGGATGGAGAGAT   |
|           | CCTCTGAGGCCGTCTGAGA     |
| Pmp22     | ATGGACACACGACTGATCTCT   |
|           | CAGCCATTCGCTCACTGATGA   |
| Prx       | GGCGGCAAAGAAGGAATC      |
|           | CAAAGAACACACGGGCACT     |

|        |                         |
|--------|-------------------------|
| Srebp2 | CAGGTGCAGACGGTACAGG     |
|        | CGTGGTCAACACAAGGGAATC   |
| Fbxo32 | CAGCTTCGTGAGCGACCTC     |
|        | GGCAGTCGAGAAGTCCAGTC    |
| MuRF1  | GTGTGAGGTGCCTACTTGCTC   |
|        | GCTCAGTCTTCTGTCCTTGGA   |
| Glut2  | TCAGAAGACAAGATCACCGGA   |
|        | GCTGGTGTGACTGTAAGTGGG   |
| Gck    | AGACGAAACACCAGATGTATTCC |
|        | GAAGCCCTTGGTCCAGTTGAG   |
| Pcx    | AATGTCCGGCGTCTGGAGTA    |
|        | ACGCACGAAACACTCGGAT     |
| Ins1   | CACTTCCTACCCCTGCTGG     |
|        | ACCACAAAGATGCTGTTTGACA  |
| Ins2   | GCTTCTTCTACACACCCATGTC  |
|        | AGCACTGATCTACAATGCCAC   |
| Sytl4  | TGAGAAAAGGATTCGGCGACT   |
|        | CTGGCACAGGTTCGATCACT    |
| Ucn3   | AAGCCTCTCCCACAAGTTCTA   |
|        | GAGGTGCGTTTGGTTGTCATC   |
| Glp1r  | ACGGTGTCCCTCTCAGAGAC    |
|        | ATCAAAGGTCCGGTTGCAGAA   |

|         |                         |
|---------|-------------------------|
| Abcc8   | TGAGCATTGGAAGACCCTCAT   |
|         | CAGCACCGAAGATAAGTTGTCA  |
| Kcnj11  | AAGGGCATTATCCCTGAGGAA   |
|         | TTGCCTTTCTTGGACACGAAG   |
| Pclo    | AAGAGTTGGATAGTAGTCAGGCT |
|         | ACCTAAACGTGTCCGTAGTTCT  |
| Noc2    | AGCAGAGAGGCTAGACATCCT   |
|         | AGACACTGGGAGAGACCGTT    |
| Pcsk1   | CTTTCGCCTTCTTTTGCGTTT   |
|         | TCCGCCGCCATTCAATTAAC    |
| Ero11b  | ACCCTGAGCTTCCTCTCAAGT   |
|         | AAAGGACATGGTCGTTTCAGATT |
| Slc30a8 | AGCCACCAAGATGTACGCC     |
|         | CTTGCTTGCTCGACCTGTT     |
| Egr2    | GCCAAGGCCGTAGACAAAATC   |
|         | CCACTCCGTTTCATCTGGTCA   |
| S100b   | TGGTTGCCCTCATTGATGTCT   |
|         | CCCATCCCCATCTTCGTCC     |
| Bdnf    | TTACCTGGATGCCGCAAACAT   |
|         | TGACCCACTCGCTAATACTGTC  |
| Ngf     | TGATCGGCGTACAGGCAGA     |
|         | GCTGAAGTTTAGTCCAGTGGG   |

|                |                        |
|----------------|------------------------|
| $\beta$ -actin | GGCTGTATTCCCCTCCATCG   |
|                | CCAGTTGGTAACAATGCCATGT |
